# Supplementary material for: Berberine mediated fluorescent gold nanoclusters in biomimetic erythrocyte ghosts as a nanocarrier for enhanced photodynamic treatment
Source: Royal Society of Chemistry journal article supplement (doi:10.1039/d3ra08299g), 2024-01-01
Supplement: d3ra08299g1.pdf [file d3ra08299g1.pdf]

## Supplementary information

### **Berberine mediated fluorescent gold nanoclusters in biomimetic erythrocyte ghosts as a nanocarrier for enhanced photodynamic treatment**

Wrenit Gem Pearl,<sup>a</sup> Rajakar Selvam,<sup>a</sup> Artashes V. Karmenyan,<sup>a</sup> Elena V. Perevedentseva,<sup>b</sup> Shih-Che Hung,<sup>c</sup> Hsin-Hou Chang,<sup>c</sup> Daniil Bratashov,<sup>d</sup> Ekaterina S. Prikhozhdenko,<sup>d</sup> Natalia Shushunova,<sup>d</sup> Valery V. Tuchin,<sup>d</sup> and Chia-Liang Cheng<sup>\*a</sup>

---

<sup>a</sup> Department of Physics, National Dong Hwa University, 97401, Taiwan

<sup>b</sup> P. N. Lebedev Physics Institute of Russian Academy of Sciences, Moscow, 119991, Russia

<sup>c</sup> Department of Molecular Biology and Human Genetics, Tzu-Chi University, Hualien 97004, Taiwan

<sup>d</sup> Science Medical Center, Saratov State University, 410012 Russia, Saratov, Astrakhanskaya, 83

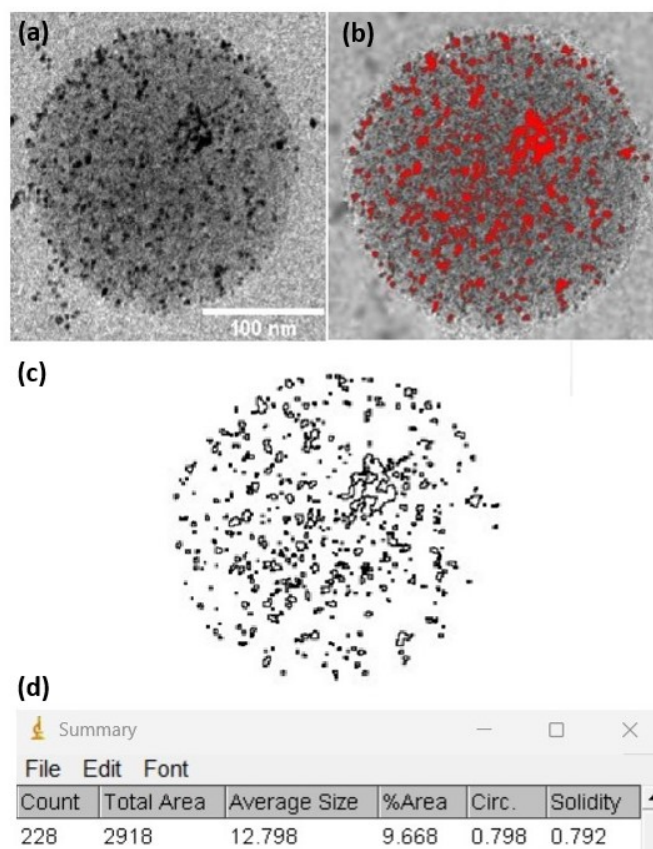

Figure S1 Characterization of AuNC@BBR nanocomposite: (a) HR-TEM image of AuNC@BBR complex. Scale bar represents 100 nm; Quantification with ImageJ (b) thresholding, (c) edge detection, and (d) summary of the quantification.

Table S1 A quantification summary for multiple AuNC@BBR complex using ImageJ Software

| Slice of AuNC@BBR TEM image | Average Size | %Area  | Mean   | Circ. | Solidity |
|-----------------------------|--------------|--------|--------|-------|----------|
| 1                           | 17.574       | 15.116 | 65.194 | 0.726 | 0.753    |
| 2                           | 16.752       | 16.371 | 36.346 | 0.711 | 0.746    |
| 3                           | 19.222       | 14.074 | 52.772 | 0.725 | 0.756    |
| 4                           | 10.762       | 10.098 | 47.723 | 0.846 | 0.798    |
| 5                           | 16.875       | 17.352 | 52.96  | 0.849 | 0.845    |
| 6                           | 18.946       | 18.523 | 76.592 | 0.867 | 0.883    |
| 7                           | 15.527       | 10.651 | 79.338 | 0.891 | 0.911    |

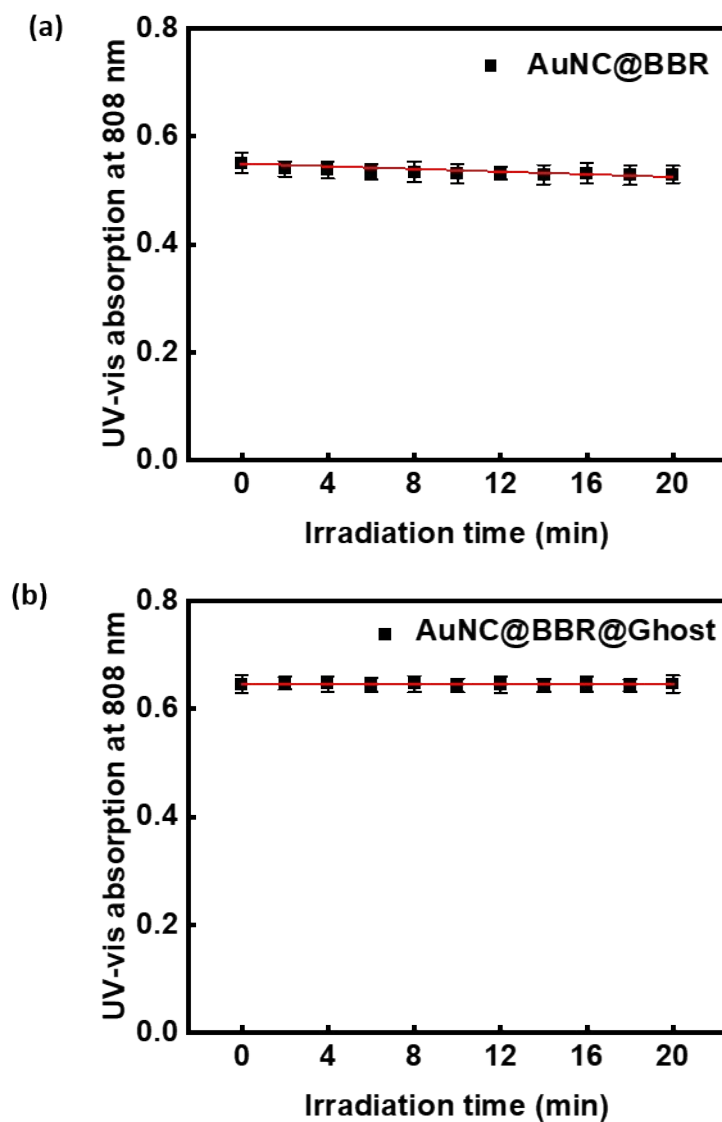

Figure S2 Photostability of (a) AuNC@BBR; and (b) AuNC@BBR@Ghost under 808 nm laser (0.75 W/cm<sup>2</sup>) irradiation within 20 min by UV-visible absorbance spectra

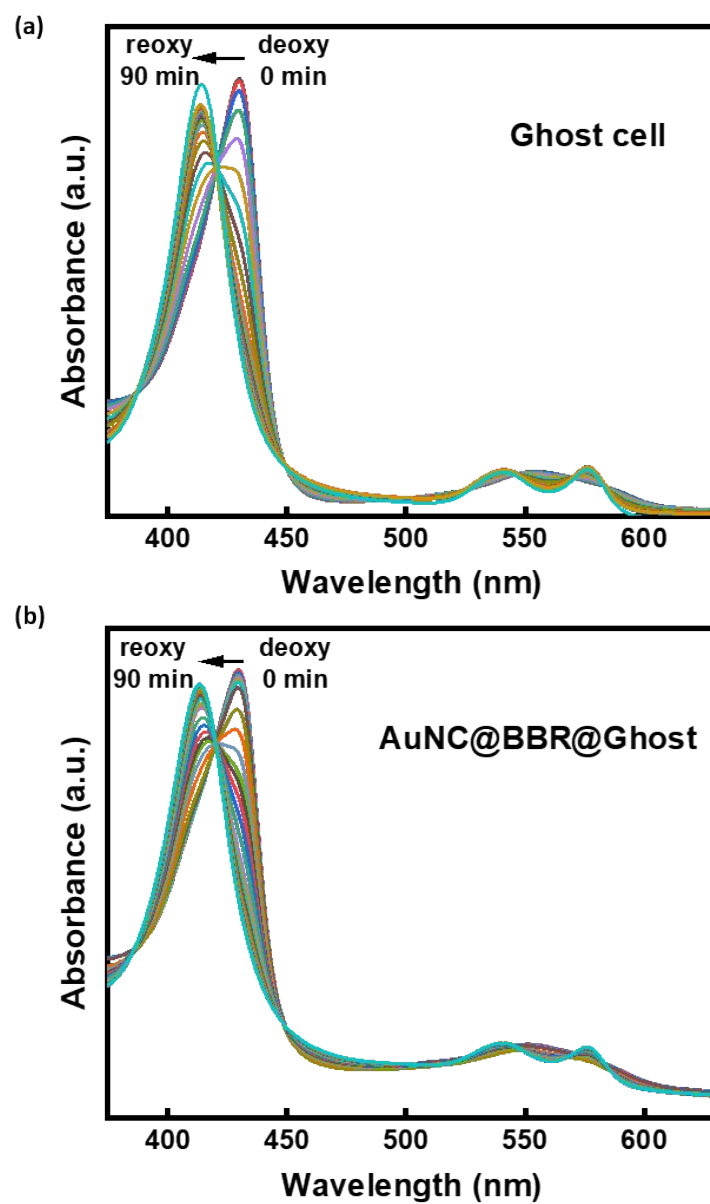

Figure S3 Time-dependent UV-Vis absorbance spectra of (a) Ghost; and (b) AuNC@BBR@Ghost in the deoxygenated and reoxygenated conditions.

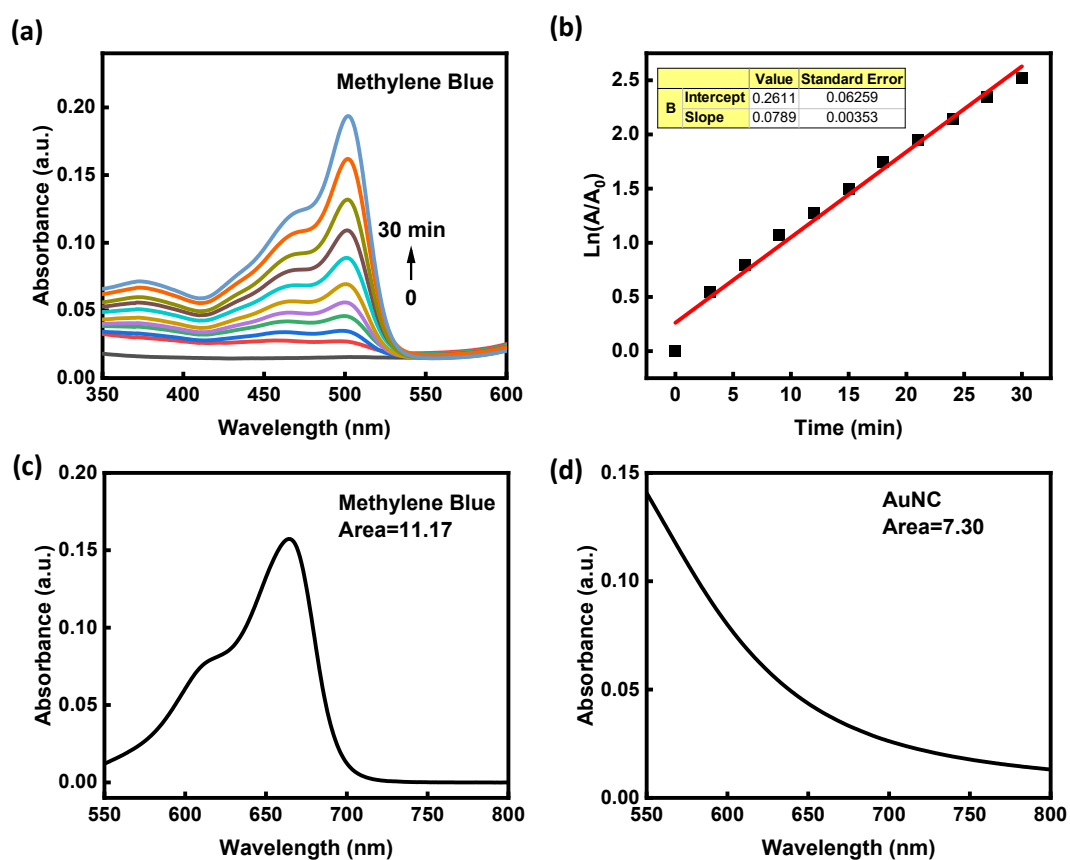

Figure S4 (a) Time-dependent absorbance of DCF at 502 nm caused by methylene blue (MB) under 808 nm laser irradiation; (b) The rate constants for DCF absorbance in the presence of MB; (c & d) The absorption peak area of MB and AuNC respectively.

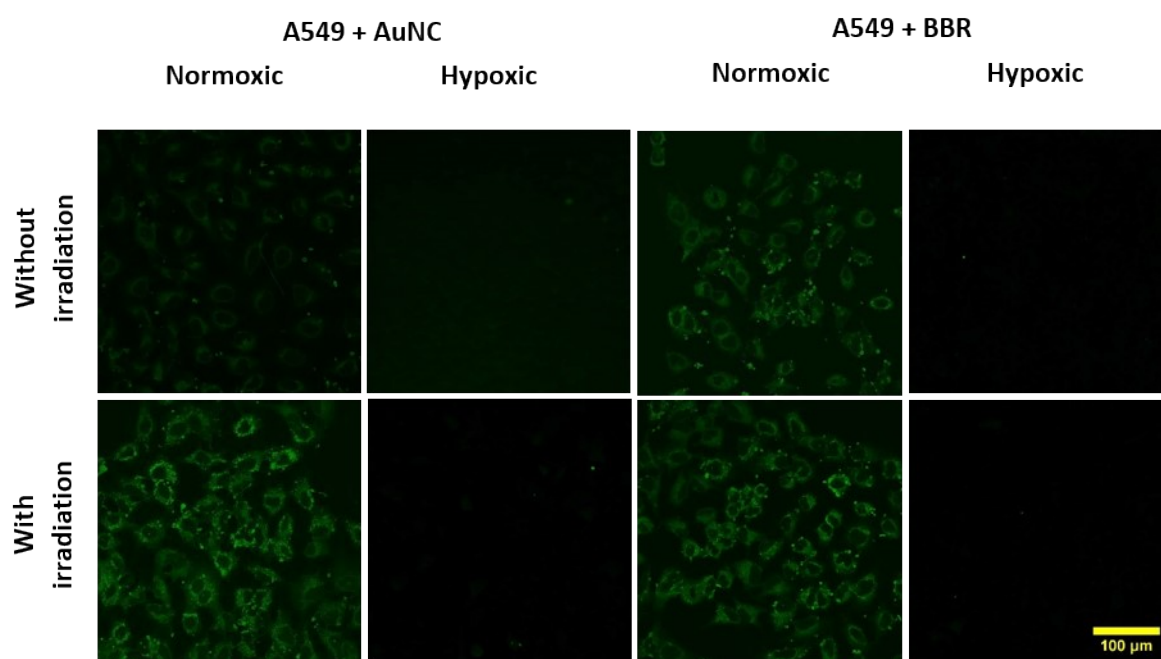

Figure S5 Identification of reactive oxygen species generation in A549 cell line using oxidized DCFDA, observed by fluorescence microscopy (Excitation: 488 nm; Emission: 520-550 nm; Objective: 20x) Scale bar represents 50  $\mu\text{m}$ .

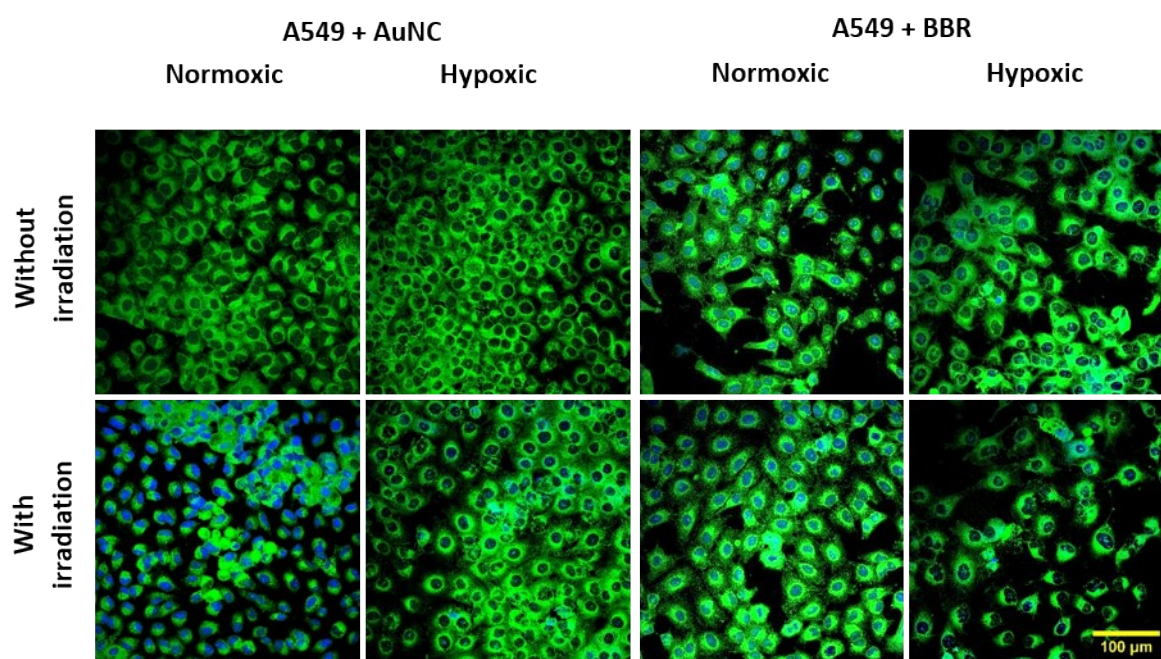

Figure S6 Discrimination of live and dead A549 normoxia and hypoxia cell line using violet fluorescent and DiOC5 staining, observed by confocal fluorescence microscopy (Objective: 20x) Scale bar represents 100  $\mu\text{m}$ .
